# Supplementary material for: Theoretical study on complexation of U(vi) with ODA, IDA and TDA based on density functional theory
Source: Royal Society of Chemistry journal article supplement (doi:10.1039/c6ra05382c), 2016-01-01
Supplement: c6ra05382c1.pdf [file c6ra05382c1.pdf]

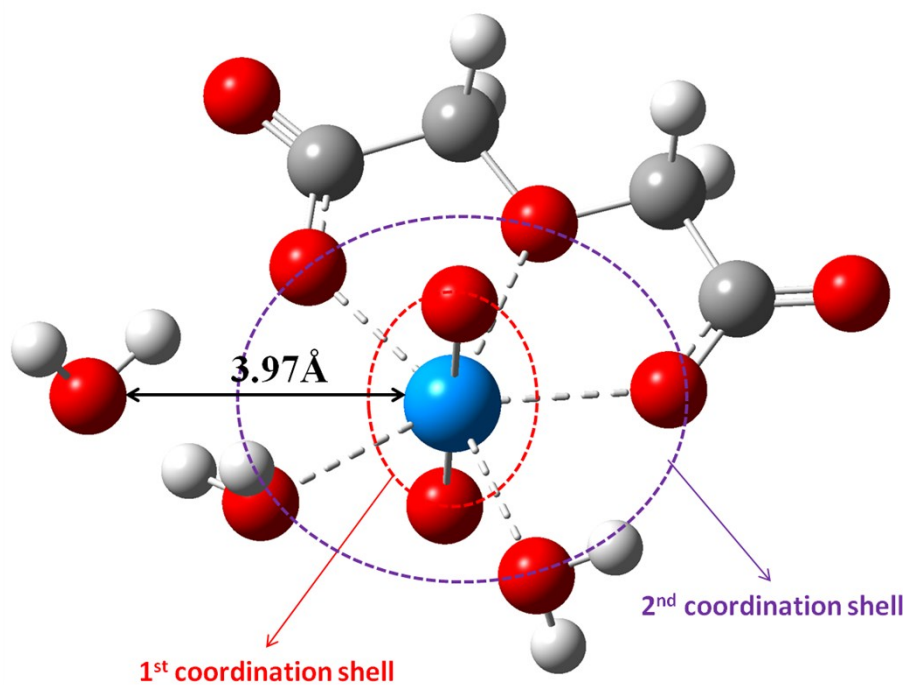

Fig. S1 Optimized structure for  $\text{UO}_2(\text{XDA})(\text{H}_2\text{O})_3$  complex

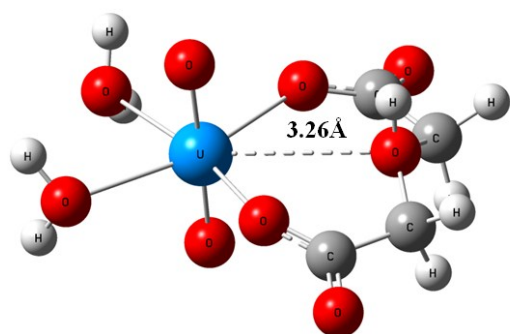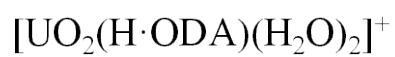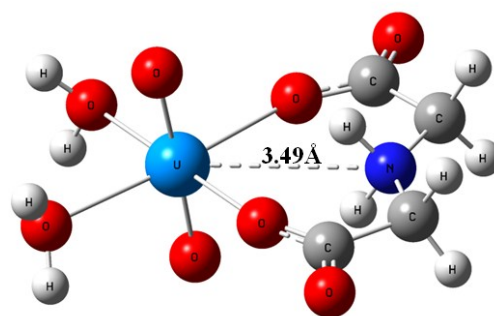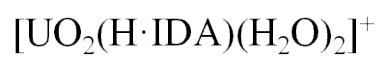

Fig. S2 Optimized structures of O-tri-11 and N-tri-11 after protonation

The U-X bonds are significantly elongated after protonation of the bridging atom.

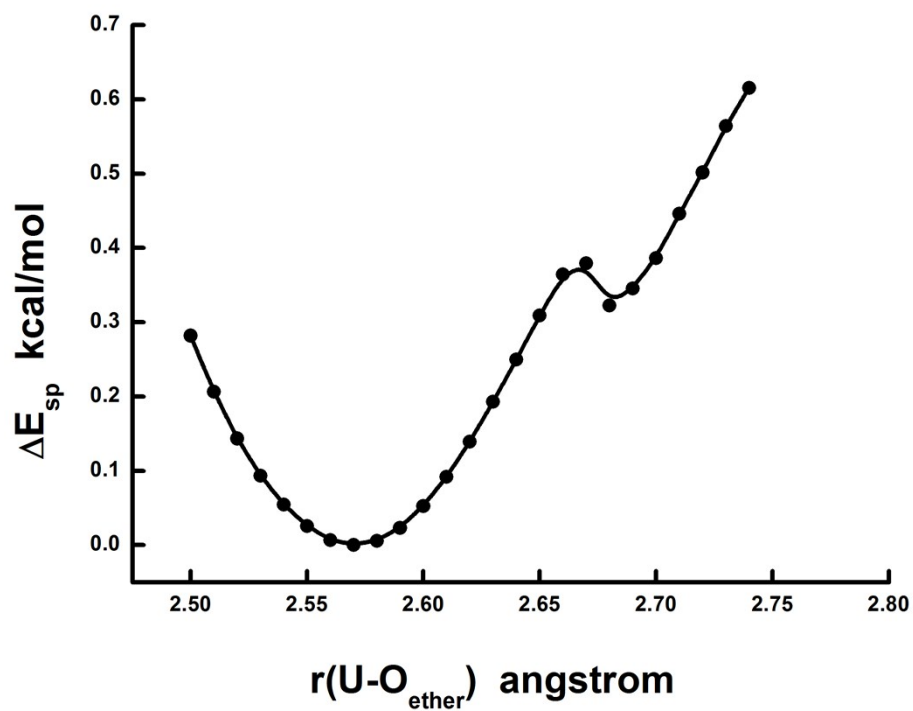

Fig. S3 Potential energy surface scan for O-tri-11 complex in aqueous solutions at B3LYP/ECP60MWB/6-31G(d) level. The U-O<sub>ether</sub> bond lengths vary between 2.50-2.74Å at the step of 0.01Å.

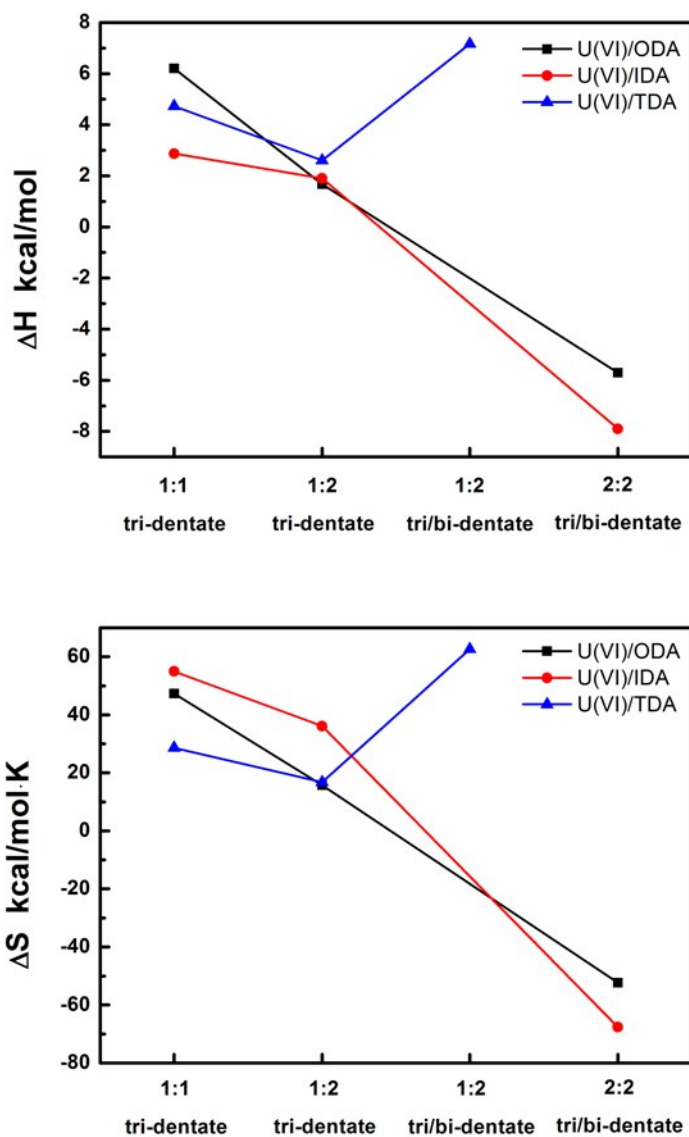

Fig. S4 Enthalpy and entropy trend graphic for U(VI) complexes with ODA, IDA and TDA, respectively

Table S1.

Reaction free energy and enthalpy values in both calculations and experimental studies (aqueous phase;  $\Delta G$  and  $\Delta H$  values are in kcal/mol and cal/K·mol)

| Mode        | $\Delta H_{\text{cal}}$ | $\Delta H_{\text{exp}}$               | $\Delta S_{\text{cal}}$ | $\Delta S_{\text{exp}}$                |
|-------------|-------------------------|---------------------------------------|-------------------------|----------------------------------------|
| O-tri-11    | -22.7                   | 6.21 <sup>1</sup> , 4.34 <sup>2</sup> | 58.4                    | 47.3 <sup>1</sup> , 38.64 <sup>2</sup> |
| N-tri-11    | -23.7                   | 2.87 <sup>1</sup>                     | 61.1                    | 54.97 <sup>1</sup>                     |
| S-tri-11    | -12.8                   | 4.73 <sup>2</sup>                     | 56.4                    | 28.66 <sup>2</sup>                     |
| O-bi-11     | 0.836                   | --                                    | 64.9                    | --                                     |
| N-bi-11     | 0.168                   | --                                    | 63.4                    | --                                     |
| S-bi-11     | 0.289                   | --                                    | 60.2                    | --                                     |
| O-tri-12    | -36.1                   | 1.67, 1.76 <sup>2</sup>               | 81.5                    | 16.73, 17.88 <sup>2</sup>              |
| N-tri-12    | -34.6                   | 1.90 <sup>1</sup>                     | 80.5                    | 36.10 <sup>1</sup>                     |
| S-tri-12    | -29.5                   | 2.60 <sup>2</sup>                     | 72.1                    | 16.78 <sup>2</sup>                     |
| O-tri/bi-12 | -26.7                   | --                                    | 82.6                    | --                                     |
| N-tri/bi-12 | -30.4                   | --                                    | 84.5                    | --                                     |
| S-tri/bi-12 | -19.0                   | 7.17 <sup>3</sup> , 6.14 <sup>4</sup> | 78.7                    | 62.62 <sup>3</sup>                     |
| O-bi-12     | -5.15                   | --                                    | 86.7                    | --                                     |
| N-bi-12     | -6.14                   | --                                    | 87.4                    | --                                     |
| S-bi-12     | -5.02                   | --                                    | 83.1                    | --                                     |
| O-tri-22    | -67.2                   | -5.7 <sup>1</sup>                     | 71.5                    | -52.3 <sup>1</sup>                     |
| N-tri-22    | -67.0                   | -7.9 <sup>1</sup>                     | 74.4                    | -67.6 <sup>1</sup>                     |
| S-tri-22    | -57.8                   | --                                    | 67.4                    | --                                     |

1. J. Jiang, J. C. Renshaw, M. J. Sarsfield, F. R. Livens, D. Collison, J. M. Charnock and H. Eccles, *Inorganic Chemistry*, 2003, **42**, 1233-1240.
2. A. Kirishima and N. Sato, *Journal of Chemical Thermodynamics*, 2014, **70**, 227-232.
3. P. Di Bernardo, P. Zanonato, A. Bismondo, H. Jiang, A. Y. Garnov, J. Jiang and L. Rao, *European Journal of Inorganic Chemistry*, 2006, 4533-4540.
4. P. D. Bernardo, G. Tomat, A. Bismondo, O. Traverso and L. Magon, *Journal of Chemical Research (Miniprint)*, 1980, 3044-3071.

## Cartesian coordinates of all the complex structures

### O-tri-11

|   |             |             |             |
|---|-------------|-------------|-------------|
| O | -1.90381200 | 0.28868400  | -0.12812400 |
| C | -2.42769300 | 1.59530900  | 0.10387800  |
| C | -2.82393700 | -0.77917400 | 0.09252600  |
| C | -1.28799100 | 2.59910300  | -0.01413700 |
| H | -2.85986500 | 1.65813700  | 1.11109000  |
| H | -3.21088600 | 1.82731800  | -0.62702200 |
| C | -2.06811300 | -2.09739900 | -0.01988500 |
| H | -3.26453700 | -0.69875700 | 1.09476900  |
| H | -3.63103700 | -0.74413400 | -0.64837000 |
| O | -0.10714900 | 2.09037500  | -0.19120000 |
| O | -1.53421500 | 3.80617900  | 0.06930900  |
| O | -0.78072100 | -1.99912100 | -0.14898500 |
| O | -2.69749600 | -3.15909500 | 0.02573300  |
| U | 0.62646300  | -0.12190200 | -0.02635000 |
| O | 0.49412600  | -0.05959400 | 1.75301300  |
| O | 0.81436600  | -0.18867100 | -1.79926200 |
| O | 2.41300500  | -1.90706900 | 0.26019800  |
| H | 2.88166600  | -1.77301300 | 1.10397900  |
| H | 3.09887600  | -1.81756400 | -0.42652400 |
| O | 2.74582800  | 1.27024600  | 0.12710100  |
| H | 2.61358100  | 1.95532000  | 0.80805300  |
| H | 2.83253000  | 1.76516400  | -0.70830400 |

## O-bi-11

|   |             |             |             |
|---|-------------|-------------|-------------|
| O | -3.33438600 | -0.37210100 | 0.03107600  |
| C | -2.38827000 | -1.42208500 | 0.05664400  |
| C | -4.66060100 | -0.86250500 | 0.05513300  |
| C | -0.99097500 | -0.85045800 | 0.05229500  |
| H | -2.49638600 | -2.04466300 | 0.95837800  |
| H | -2.49212100 | -2.08465500 | -0.81495300 |
| C | -5.66977200 | 0.26093200  | -0.02938500 |
| H | -4.86702500 | -1.42485300 | 0.97727800  |
| H | -4.85408000 | -1.53926000 | -0.79087000 |
| O | -0.00296700 | -1.65430400 | -0.05886600 |
| O | -0.77380500 | 0.39585200  | 0.16243400  |
| O | -5.12605300 | 1.47298600  | -0.21284000 |
| O | -6.86922700 | 0.05866900  | 0.05165400  |
| H | -5.85560700 | 2.12455100  | -0.26268800 |
| U | 1.66778700  | 0.10477700  | -0.00339900 |
| O | 1.77831200  | -0.00034400 | 1.76117300  |
| O | 1.60691400  | 0.24786700  | -1.76851500 |
| O | 3.63379600  | -1.39523100 | -0.17207200 |
| H | 3.65765500  | -1.87824300 | -1.01863600 |
| H | 3.64351500  | -2.08104800 | 0.52140700  |
| O | 1.57563100  | 2.58420800  | 0.14817900  |
| H | 1.14019200  | 2.87306000  | 0.97145100  |
| H | 1.03943900  | 2.95954900  | -0.57458900 |

## O-tri-12

|   |             |             |             |
|---|-------------|-------------|-------------|
| O | 2.73751100  | 0.00043900  | -0.08135400 |
| C | 3.32256800  | 1.20072300  | -0.56093400 |
| C | 3.32334800  | -1.19946600 | -0.56089200 |
| C | 2.47771700  | 2.34921700  | -0.02475300 |
| H | 4.35791100  | 1.29758400  | -0.21136200 |
| H | 3.32477700  | 1.22426500  | -1.66028400 |
| C | 2.47897700  | -2.34838000 | -0.02493100 |
| H | 3.32574400  | -1.22299000 | -1.66025000 |
| H | 4.35867600  | -1.29578300 | -0.21113900 |
| O | 1.35729300  | 2.00824300  | 0.51337200  |
| O | 2.89906200  | 3.51198800  | -0.13361800 |
| O | 1.35758500  | -2.00814900 | 0.51160900  |
| O | 2.90153800  | -3.51083300 | -0.13260000 |
| U | 0.01029200  | 0.00001400  | 0.16983100  |
| O | -0.20849700 | 0.00000100  | 1.94732200  |
| O | 0.20749000  | -0.00009600 | -1.61067100 |
| O | -2.67686000 | -0.00045900 | -0.21781600 |
| C | -3.44363200 | -1.19264000 | -0.27532800 |
| C | -3.44412300 | 1.19141800  | -0.27534600 |
| C | -2.48598900 | -2.36858300 | -0.18009500 |
| H | -4.16224200 | -1.23298300 | 0.55462500  |
| H | -4.00536900 | -1.24711300 | -1.21744300 |
| C | -2.48695300 | 2.36777600  | -0.18021500 |
| H | -4.00586000 | 1.24561500  | -1.21748500 |
| H | -4.16278000 | 1.23147100  | 0.55457100  |
| O | -1.24170700 | -2.07120800 | -0.03713300 |
| O | -2.94656700 | -3.52021600 | -0.23943600 |
| O | -1.24239500 | 2.07083800  | -0.03885100 |
| O | -2.94810700 | 3.51923600  | -0.23841800 |



## O-tri/bi-12

|   |             |             |             |
|---|-------------|-------------|-------------|
| O | -3.30239900 | 0.36716000  | 0.14622600  |
| C | -3.82764200 | 1.66935300  | -0.10638600 |
| C | -4.21403100 | -0.70759600 | -0.07796200 |
| C | -2.68175700 | 2.67570500  | -0.08605900 |
| H | -4.31018000 | 1.69910900  | -1.09210500 |
| H | -4.57217900 | 1.93323200  | 0.65344800  |
| C | -3.45620500 | -2.02423400 | 0.05449600  |
| H | -5.03228900 | -0.67183000 | 0.65061300  |
| H | -4.64074500 | -0.63677300 | -1.08705800 |
| O | -1.48708800 | 2.17293700  | -0.01547500 |
| O | -2.94009300 | 3.88155700  | -0.15490100 |
| O | -2.17358400 | -1.92412900 | 0.21616800  |
| O | -4.08457800 | -3.08650800 | -0.00670100 |
| U | -0.76847000 | -0.05052700 | 0.03531200  |
| O | -0.89332800 | -0.13344600 | -1.74778300 |
| O | -0.63414500 | 0.02975500  | 1.81835800  |
| O | 4.26939900  | -0.27301300 | -0.03551100 |
| C | 3.40655000  | -1.38356800 | -0.19227000 |
| C | 5.62851600  | -0.63361900 | -0.14671200 |
| C | 1.96723200  | -0.91863300 | -0.11399200 |
| H | 3.55306200  | -1.87176500 | -1.16867900 |
| H | 3.57595700  | -2.14234500 | 0.58450800  |
| C | 6.47315700  | 0.60781800  | 0.06881400  |
| H | 5.91383500  | -1.38752400 | 0.60362700  |
| H | 5.85826900  | -1.05336700 | -1.13855100 |
| O | 1.68047600  | 0.31934300  | -0.16196700 |
| O | 1.04929500  | -1.79482700 | -0.01719900 |
| O | 6.02951700  | 1.70605500  | 0.33614200  |
| O | 7.80585300  | 0.43047200  | -0.04989000 |
| H | 8.02397500  | -0.49445300 | -0.27384500 |

## O-bi-12

|   |             |             |             |
|---|-------------|-------------|-------------|
| C | -6.34451500 | 0.79405700  | 0.05162500  |
| C | -4.06934200 | 1.46185800  | 0.04700300  |
| C | -7.21160500 | -0.43505700 | -0.15620900 |
| H | -6.53443100 | 1.48857700  | -0.77913500 |
| H | -6.64738000 | 1.28671900  | 0.98466700  |
| C | -2.65835300 | 0.92010100  | 0.01198700  |
| H | -4.22349100 | 2.08603800  | -0.84569000 |
| H | -4.17087600 | 2.10777100  | 0.92970400  |
| O | -6.55577500 | -1.57511400 | -0.42452100 |
| O | -8.42676500 | -0.39997600 | -0.10249800 |
| O | -2.42978400 | -0.32358300 | -0.12067900 |
| O | -1.68922900 | 1.74252100  | 0.12170400  |
| U | 0.01514200  | -0.03081500 | 0.05225000  |
| O | 0.11180700  | 0.12420900  | -1.71400000 |
| O | -0.08219300 | -0.18629500 | 1.81830900  |
| H | -5.59257400 | -1.38226000 | -0.41477300 |
| C | 4.11283400  | -1.48458700 | 0.01459100  |
| C | 6.36675400  | -0.71528400 | -0.05510300 |
| C | 2.69609200  | -0.96179600 | 0.09396500  |
| H | 4.22889500  | -2.31196000 | 0.72699800  |
| H | 4.26338900  | -1.88938500 | -0.99691400 |
| C | 7.11213100  | 0.60069100  | -0.19610000 |
| H | 6.86282700  | -1.32782000 | 0.70752700  |
| H | 6.43567600  | -1.24255300 | -1.01707300 |
| O | 2.45697600  | 0.27861000  | 0.23940100  |
| O | 1.73388500  | -1.79106400 | -0.02467300 |
| O | 6.34603700  | 1.70262100  | -0.21109800 |
| O | 8.32173400  | 0.66493100  | -0.31325100 |
| H | 5.41107500  | 1.41780500  | -0.10204400 |
| O | -4.98761900 | 0.38591600  | 0.08708200  |
| O | 5.01965400  | -0.43250500 | 0.28536800  |

## O-tri-22

|   |             |             |             |
|---|-------------|-------------|-------------|
| O | 4.48994500  | 0.01421400  | -0.10935300 |
| C | 5.23630900  | 1.22385600  | -0.19550500 |
| C | 5.25848300  | -1.18191800 | -0.19552300 |
| C | 4.27064000  | 2.40091600  | -0.10737600 |
| H | 5.78263000  | 1.26794800  | -1.14646200 |
| H | 5.96335900  | 1.28291900  | 0.62443400  |
| C | 4.31141700  | -2.37580900 | -0.13245200 |
| H | 5.81794000  | -1.20875000 | -1.13950500 |
| H | 5.97535400  | -1.23519500 | 0.63361400  |
| O | 3.01883200  | 2.10340700  | 0.01848800  |
| O | 4.73207800  | 3.54891700  | -0.15779300 |
| O | 3.05145800  | -2.09959800 | -0.04592100 |
| O | 4.79321400  | -3.51602200 | -0.16712600 |
| U | 1.91792900  | -0.00794300 | 0.04245200  |
| O | 1.79381000  | 0.04074800  | -1.75251900 |
| O | 2.03513400  | -0.05979600 | 1.83782600  |
| O | -4.51187300 | 0.01919100  | -0.03324000 |
| C | -5.22922600 | -1.17004700 | -0.35619800 |
| C | -5.19929100 | 1.23107100  | -0.33548200 |
| C | -4.30906400 | -2.37043900 | -0.16101400 |
| H | -5.56025500 | -1.14111000 | -1.40337100 |
| H | -6.11348700 | -1.26687900 | 0.28429600  |
| C | -4.25562700 | 2.40504200  | -0.09721200 |
| H | -5.51673200 | 1.23522700  | -1.38717800 |
| H | -6.08974300 | 1.33163900  | 0.29586300  |
| O | -3.05843200 | -2.10167200 | 0.02820300  |
| O | -4.79589700 | -3.50763600 | -0.21398800 |
| O | -3.01830500 | 2.10278600  | 0.12441300  |
| O | -4.71349600 | 3.55443800  | -0.14739100 |
| U | -1.92355300 | -0.01208400 | 0.09640400  |
| O | -1.83494900 | 0.05230300  | -1.70037100 |
| O | -2.00945900 | -0.07902100 | 1.89320800  |
| H | -0.01199400 | 1.93754600  | -0.59526900 |
| H | 0.01502200  | -1.81565100 | 1.03412700  |
| O | -0.00250600 | 1.39821100  | 0.21601300  |
| O | -0.00036500 | -1.41062600 | 0.14821000  |

## N-tri-11

|   |             |             |             |
|---|-------------|-------------|-------------|
| C | -2.81762100 | -0.54599900 | -0.21611100 |
| C | -2.16262100 | 1.84518000  | -0.23874100 |
| C | -2.21275700 | -1.92915100 | 0.01434100  |
| H | -2.92550500 | -0.41173800 | -1.29878000 |
| H | -3.81928700 | -0.49353000 | 0.22466000  |
| C | -0.95844100 | 2.74622500  | 0.02881800  |
| H | -2.28640600 | 1.77074300  | -1.32529200 |
| H | -3.07161000 | 2.30357100  | 0.16697800  |
| O | -0.93137900 | -1.93644100 | 0.24792600  |
| O | -2.91645900 | -2.94174100 | -0.05613500 |
| O | 0.13745500  | 2.11827600  | 0.35109800  |
| O | -1.05397600 | 3.97176500  | -0.08982700 |
| U | 0.58612600  | -0.15968300 | 0.04907600  |
| O | 0.24797700  | -0.01830600 | -1.69928400 |
| O | 0.95135200  | -0.29884400 | 1.79472000  |
| O | 2.88840700  | 0.83686900  | -0.35650700 |
| H | 2.79942600  | 1.52997900  | -1.03669000 |
| H | 3.14518100  | 1.31811200  | 0.45161300  |
| O | 2.08084300  | -2.20322900 | -0.39831700 |
| H | 2.54422900  | -2.06425800 | -1.24408400 |
| H | 2.78795400  | -2.20407500 | 0.27240900  |
| N | -1.91469500 | 0.49719500  | 0.29733000  |
| H | -2.01978700 | 0.53731700  | 1.31367500  |

## N-bi-11

|   |             |             |             |
|---|-------------|-------------|-------------|
| C | -2.47806400 | -1.30570100 | 0.18359700  |
| C | -4.80370800 | -0.71343300 | 0.16976900  |
| C | -1.06171200 | -0.80217900 | 0.07906500  |
| H | -2.58953700 | -1.69454100 | 1.21360000  |
| H | -2.58889800 | -2.16570700 | -0.48377700 |
| C | -5.86479500 | 0.33834200  | -0.05780700 |
| H | -4.91608400 | -1.03433700 | 1.22222600  |
| H | -5.06866900 | -1.57768500 | -0.44570000 |
| O | -0.09619600 | -1.62985000 | -0.05970800 |
| O | -0.79854400 | 0.44251500  | 0.17235600  |
| O | -5.39901100 | 1.59690600  | 0.05353900  |
| O | -7.03843600 | 0.08094800  | -0.26746300 |
| H | -6.15042400 | 2.21070900  | -0.07581700 |
| U | 1.61808900  | 0.09221500  | -0.01503800 |
| O | 1.72717700  | -0.02591900 | 1.74978000  |
| O | 1.55827000  | 0.23687900  | -1.78100700 |
| O | 3.52029700  | -1.46530000 | -0.17489200 |
| H | 3.53642100  | -1.94956900 | -1.02112500 |
| H | 3.51301100  | -2.15016400 | 0.51985300  |
| O | 3.05390000  | 2.10951600  | 0.12039600  |
| H | 2.95251000  | 2.59110700  | 0.96193000  |
| H | 2.86414600  | 2.75994500  | -0.58076200 |
| N | -3.44974700 | -0.26991000 | -0.15609100 |
| H | -3.23846100 | 0.54811900  | 0.41394500  |

## N-tri-12

|   |             |             |             |
|---|-------------|-------------|-------------|
| C | -3.21810200 | 1.36593000  | 0.10944500  |
| C | -3.35947700 | -1.08618700 | 0.26840100  |
| C | -2.27542800 | 2.47285300  | -0.33614900 |
| H | -3.29775400 | 1.40256800  | 1.19891300  |
| H | -4.21631400 | 1.53930700  | -0.30289300 |
| C | -2.53651000 | -2.33917700 | 0.01299400  |
| H | -3.45867100 | -0.95934200 | 1.34956200  |
| H | -4.36486100 | -1.21008600 | -0.14416700 |
| O | -1.09259800 | 2.09820500  | -0.64402500 |
| O | -2.68372300 | 3.64884200  | -0.37348500 |
| O | -1.31277900 | -2.14396100 | -0.30476200 |
| O | -3.07026700 | -3.45807400 | 0.12973400  |
| U | -0.00190500 | -0.04491200 | 0.03673800  |
| O | -0.43719800 | -0.03688000 | 1.77489800  |
| O | 0.40622000  | -0.08571300 | -1.70692800 |
| N | -2.65740200 | 0.07255600  | -0.28499500 |
| H | -2.69259200 | 0.00808500  | -1.30067500 |
| C | 3.21582300  | 1.28312300  | -0.29048800 |
| C | 3.25531400  | -1.17948400 | -0.47687300 |
| C | 2.37323700  | 2.40377900  | 0.30311300  |
| H | 3.15226800  | 1.34185000  | -1.38014900 |
| H | 4.26506900  | 1.41616200  | -0.01123400 |
| C | 2.45999700  | -2.40524800 | -0.04945400 |
| H | 3.17982700  | -1.08130300 | -1.56282600 |
| H | 4.31173700  | -1.31534900 | -0.22755000 |
| O | 1.22524300  | 2.05304900  | 0.74074800  |
| O | 2.82575200  | 3.56464000  | 0.32928800  |
| O | 1.29903100  | -2.17041000 | 0.43571400  |
| O | 2.95637500  | -3.53886300 | -0.19098900 |
| N | 2.66734000  | 0.00203900  | 0.15289600  |
| H | 2.80942900  | -0.07234100 | 1.15835400  |

## N-tri/bi-12

|   |             |             |             |
|---|-------------|-------------|-------------|
| C | -4.14202600 | -0.81018200 | -0.39727100 |
| C | -3.76681900 | 1.64316400  | -0.42761300 |
| C | -3.37924100 | -2.11102100 | -0.14742100 |
| H | -4.22058500 | -0.68368500 | -1.48330000 |
| H | -5.16031800 | -0.89301000 | -0.00096600 |
| C | -2.68850600 | 2.68104000  | -0.11877200 |
| H | -3.81661200 | 1.53462900  | -1.51719200 |
| H | -4.74332500 | 2.00766000  | -0.08828900 |
| O | -2.12479600 | -1.97102500 | 0.16943800  |
| O | -3.94911300 | -3.19978600 | -0.28084700 |
| O | -1.54839100 | 2.19338000  | 0.28061700  |
| O | -2.91774700 | 3.88488900  | -0.27686000 |
| U | -0.82128900 | -0.02678100 | 0.13576300  |
| O | -0.97416300 | 0.04577300  | -1.64939600 |
| O | -0.70244100 | -0.09385300 | 1.92442000  |
| N | -3.40977400 | 0.34013300  | 0.15673100  |
| H | -3.59224900 | 0.38230800  | 1.16153800  |
| C | 3.37600400  | -1.32250000 | -0.20918100 |
| C | 5.68649200  | -0.66716800 | -0.18654900 |
| C | 1.94006200  | -0.86359000 | -0.09244300 |
| H | 3.50609000  | -2.19397100 | 0.44097300  |
| H | 3.50310500  | -1.69074400 | -1.24458600 |
| C | 6.63190300  | 0.50469900  | -0.08432400 |
| H | 6.03370700  | -1.46235300 | 0.48212300  |
| H | 5.79083200  | -1.06360600 | -1.21369100 |
| O | 1.65288700  | 0.37674600  | -0.04077000 |
| O | 1.01176700  | -1.73659000 | -0.07879400 |
| O | 6.29688400  | 1.67387000  | -0.00278700 |
| O | 7.92127000  | 0.11184700  | -0.13620300 |
| N | 4.32538100  | -0.27689000 | 0.15462400  |
| H | 4.09381300  | 0.55910200  | -0.38068800 |
| H | 8.47838900  | 0.91613300  | -0.11471700 |

## N-bi-12

|   |             |             |             |
|---|-------------|-------------|-------------|
| C | 6.45962500  | -0.15210900 | -0.00537000 |
| C | 4.28002200  | -1.14744700 | -0.17089600 |
| C | 7.29026100  | 1.10713500  | 0.08120500  |
| H | 6.90469800  | -0.78125400 | -0.78169900 |
| H | 6.62149300  | -0.68146900 | 0.95267300  |
| C | 2.79171200  | -0.89867300 | -0.18774700 |
| H | 4.52027700  | -1.83444700 | -0.99003700 |
| H | 4.48805000  | -1.70141300 | 0.76300900  |
| O | 6.57216000  | 2.20321400  | 0.39112300  |
| O | 8.50174000  | 1.12695400  | -0.05972300 |
| O | 2.32401800  | 0.28829900  | -0.12744800 |
| O | 1.98343900  | -1.88595400 | -0.20883000 |
| U | -0.01273200 | -0.42817500 | 0.01194800  |
| O | -0.14525500 | -0.36862300 | -1.75945300 |
| O | 0.11460700  | -0.50402000 | 1.78295100  |
| N | 5.04912200  | 0.08683700  | -0.29988500 |
| H | 4.69032800  | 0.74454000  | 0.39074100  |
| H | 7.19226600  | 2.95709200  | 0.46489900  |
| C | -3.93681500 | 1.44055700  | -0.08095600 |
| C | -6.31400700 | 1.12689900  | -0.52495300 |
| C | -2.60408600 | 0.74969600  | 0.08325100  |
| H | -4.06782100 | 2.13802400  | 0.75386700  |
| H | -3.85814200 | 2.05281100  | -0.99344300 |
| C | -7.49981100 | 0.34767400  | 0.02482700  |
| H | -6.37224600 | 2.13166600  | -0.09014200 |
| H | -6.43532400 | 1.23717800  | -1.60942400 |
| O | -2.50682200 | -0.51783000 | 0.10672100  |
| O | -1.54447800 | 1.46512000  | 0.14846400  |
| O | -7.18114900 | -0.52873200 | 0.98986300  |
| O | -8.65149700 | 0.50931000  | -0.34143000 |
| N | -5.05352700 | 0.49619900  | -0.11969000 |
| H | -4.82553300 | -0.23616800 | -0.79132500 |
| H | -6.19141500 | -0.46005600 | 1.07463400  |



## N-tri-22

|   |             |             |             |
|---|-------------|-------------|-------------|
| C | -5.17599700 | -1.22598200 | 0.30315400  |
| C | -5.14692100 | 1.25026600  | 0.34206700  |
| C | -4.24917700 | -2.41394200 | 0.04579100  |
| H | -6.17201200 | -1.43663500 | -0.10384400 |
| H | -5.28151400 | -1.12558400 | 1.38997900  |
| C | -4.21119000 | 2.42981200  | 0.07962600  |
| H | -6.15056100 | 1.48163700  | -0.03433600 |
| H | -5.22504300 | 1.13019700  | 1.42923000  |
| O | -3.01437900 | -2.11358500 | -0.21272400 |
| O | -4.69072000 | -3.56893300 | 0.12404100  |
| O | -2.99548700 | 2.11564800  | -0.24429000 |
| O | -4.62705300 | 3.58940800  | 0.21191000  |
| U | -1.92228100 | -0.00543000 | -0.14334900 |
| O | -1.81004500 | -0.04403200 | -1.94333800 |
| O | -2.07862200 | 0.02732900  | 1.65240000  |
| C | 5.15337900  | 1.23195200  | -0.36681200 |
| C | 5.16601700  | -1.24371500 | -0.29221300 |
| C | 4.22431000  | 2.42061600  | -0.12262600 |
| H | 5.22962500  | 1.09457100  | -1.45213200 |
| H | 6.15861800  | 1.46339200  | 0.00509300  |
| C | 4.23385300  | -2.42238100 | -0.01220800 |
| H | 5.26641700  | -1.16000100 | -1.38083200 |
| H | 6.16299200  | -1.45474200 | 0.11241200  |
| O | 3.00266400  | 2.11820900  | 0.19031700  |
| O | 4.65062000  | 3.57598000  | -0.25834600 |
| O | 3.00799400  | -2.11018700 | 0.27284600  |
| O | 4.66330100  | -3.58144200 | -0.09734200 |
| U | 1.92280200  | 0.00052400  | 0.14589600  |
| O | 2.07692600  | -0.04802300 | -1.64968600 |
| O | 1.81308100  | 0.05560400  | 1.94568200  |
| H | 0.07740000  | -1.87486900 | -0.83068600 |
| H | -0.07616800 | 1.86811700  | 0.83627100  |
| O | 0.00434500  | -1.41213900 | 0.02341400  |
| O | -0.00390500 | 1.40621500  | -0.01832300 |
| N | 4.59325900  | 0.00778900  | 0.22262700  |
| H | 4.75049600  | 0.04072100  | 1.23132200  |
| N | -4.59285300 | 0.01384900  | -0.22734000 |
| H | -4.74643900 | 0.03293400  | -1.23700500 |

## S-tri-11

|   |             |             |             |
|---|-------------|-------------|-------------|
| C | -2.40663600 | 1.78336600  | -0.25417100 |
| C | -2.83422700 | -1.10375300 | -0.22115100 |
| C | -1.14995000 | 2.66118800  | -0.17367500 |
| H | -3.27902700 | 2.35827000  | 0.06130300  |
| H | -2.55343800 | 1.47408000  | -1.29459900 |
| C | -1.84730500 | -2.27897100 | -0.20387200 |
| H | -3.80543600 | -1.43553500 | 0.15086100  |
| H | -2.96010100 | -0.76711000 | -1.25582900 |
| O | -0.06142000 | 2.07660300  | 0.23741500  |
| O | -1.22476700 | 3.84580400  | -0.50472800 |
| O | -0.63835700 | -2.01883700 | 0.20081300  |
| O | -2.23687300 | -3.38818700 | -0.57464100 |
| U | 0.70857700  | -0.11453200 | 0.06628500  |
| O | 1.08748100  | -0.18016200 | 1.80785900  |
| O | 0.29259000  | -0.04649800 | -1.66689300 |
| O | 2.51276800  | -1.86816400 | -0.31128000 |
| H | 3.21076900  | -1.75358700 | 0.35936700  |
| H | 2.95770200  | -1.71141600 | -1.16423900 |
| O | 2.81390400  | 1.28192100  | -0.38293200 |
| H | 2.85258500  | 1.97919000  | 0.29770500  |
| H | 2.66501300  | 1.76378700  | -1.21704300 |
| S | -2.20068800 | 0.28990500  | 0.78978700  |

## S-bi-11

|   |             |             |             |
|---|-------------|-------------|-------------|
| C | 2.19914000  | -1.19362700 | -0.02182700 |
| C | 4.90734000  | -0.79233400 | 0.14333600  |
| C | 0.77052400  | -0.71320700 | -0.05940700 |
| H | 2.36452200  | -1.85156700 | -0.88292200 |
| H | 2.33266400  | -1.79517700 | 0.88391500  |
| C | 6.17065500  | 0.02649600  | 0.00870500  |
| H | 4.93969300  | -1.58224500 | -0.61006200 |
| H | 4.92212700  | -1.26417900 | 1.13357900  |
| O | -0.17556100 | -1.56554300 | 0.06961400  |
| O | 0.47764900  | 0.51386000  | -0.20536900 |
| O | 6.03889900  | 1.28673300  | 0.46061000  |
| O | 7.21466000  | -0.41829800 | -0.43367700 |
| H | 6.89879100  | 1.74219200  | 0.35055400  |
| U | -1.94857700 | 0.06657100  | -0.00445500 |
| O | -2.07181100 | -0.05272700 | -1.76722600 |
| O | -1.87790500 | 0.22614400  | 1.75863600  |
| O | -3.96567500 | -1.35616200 | 0.23265900  |
| H | -3.98331400 | -1.83314000 | 1.08280000  |
| H | -4.03311500 | -2.04392100 | -0.45544800 |
| O | -1.86062500 | 2.54469300  | -0.16514700 |
| H | -1.43074100 | 2.82057300  | -0.99596900 |
| H | -1.30558400 | 2.91359200  | 0.54663700  |
| S | 3.37756800  | 0.21098900  | -0.04180600 |

## S-tri-12

|   |             |             |             |
|---|-------------|-------------|-------------|
| C | -4.03170000 | -1.41663000 | -0.17526300 |
| C | -4.03141900 | 1.41716200  | -0.17563500 |
| C | -2.65699200 | -1.67842400 | 0.46032500  |
| H | -4.28482700 | -2.29736100 | -0.77861200 |
| H | -4.77571800 | -1.34066800 | 0.62187100  |
| C | -2.65663700 | 1.67855600  | 0.45992300  |
| H | -4.28419500 | 2.29780200  | -0.77925300 |
| H | -4.77554000 | 1.34161900  | 0.62145100  |
| O | -1.60966900 | -1.46419900 | -0.27346700 |
| O | -2.63205900 | -2.13869900 | 1.61196700  |
| O | -1.60942000 | 1.46434000  | -0.27408600 |
| O | -2.63142000 | 2.13835400  | 1.61173000  |
| U | 0.21407500  | 0.00009200  | 0.01113100  |
| O | 0.57948500  | -0.00006300 | -1.74990000 |
| O | -0.02142600 | 0.00024400  | 1.78958000  |
| S | -4.19956700 | 0.00012500  | -1.32260600 |
| C | 3.65732700  | -1.45353000 | -0.28356800 |
| C | 3.65783600  | 1.45306700  | -0.28301200 |
| C | 2.53089100  | -2.49779500 | -0.25385000 |
| H | 4.58845100  | -1.91047100 | 0.05664900  |
| H | 3.79651100  | -1.12223300 | -1.31837500 |
| C | 2.53151300  | 2.49746000  | -0.25353800 |
| H | 4.58885800  | 1.90985400  | 0.05769300  |
| H | 3.79744200  | 1.12202300  | -1.31784200 |
| O | 1.35275400  | -2.08207400 | 0.08338400  |
| O | 2.80267100  | -3.66359000 | -0.56676800 |
| O | 1.35322700  | 2.08188500  | 0.08336600  |
| O | 2.80353200  | 3.66323200  | -0.56633000 |
| S | 3.23380200  | -0.00035500 | 0.75036900  |

## S-tri/bi-12

|   |             |             |             |
|---|-------------|-------------|-------------|
| C | -3.84970500 | 1.94778800  | -0.55809800 |
| C | -4.41281500 | -0.91488800 | -0.67632900 |
| C | -2.58356000 | 2.76146800  | -0.24887900 |
| H | -3.82813400 | 1.66129800  | -1.61502300 |
| H | -4.73472600 | 2.56309900  | -0.38652500 |
| C | -3.52329500 | -2.15378200 | -0.49320700 |
| H | -5.45749400 | -1.18464300 | -0.51167000 |
| H | -4.30686900 | -0.55988800 | -1.70719000 |
| O | -1.60840600 | 2.12271200  | 0.32930600  |
| O | -2.54718500 | 3.95104800  | -0.57183200 |
| O | -2.36413400 | -1.96258800 | 0.06486300  |
| O | -3.93515900 | -3.24534400 | -0.89322400 |
| U | -0.93918700 | -0.11878700 | 0.22576600  |
| O | -1.09601000 | 0.02874200  | -1.54934200 |
| O | -0.86262400 | -0.24913700 | 2.00865300  |
| C | 3.32379100  | -1.10823000 | -0.04161500 |
| C | 5.99956800  | -0.60004400 | -0.08831500 |
| C | 1.86452500  | -0.71624900 | 0.00193400  |
| H | 3.47740800  | -1.76944900 | -0.90112100 |
| H | 3.53885600  | -1.69087600 | 0.86166600  |
| C | 7.19000200  | 0.32523900  | -0.18745600 |
| H | 6.07392100  | -1.17257100 | 0.84395800  |
| H | 6.04491300  | -1.31786100 | -0.91629400 |
| O | 1.49637300  | 0.49856900  | 0.06492500  |
| O | 0.99510900  | -1.65033600 | -0.00502900 |
| O | 7.12758400  | 1.53331100  | -0.31345900 |
| O | 8.39912700  | -0.27481200 | -0.12906000 |
| H | 8.30792300  | -1.24125100 | -0.02569100 |
| S | -3.90838600 | 0.42683800  | 0.46929500  |
| S | 4.43344600  | 0.34662400  | -0.13849400 |

## S-bi-12

|   |             |             |             |
|---|-------------|-------------|-------------|
| C | -6.34451500 | 0.79405700  | 0.05162500  |
| C | -4.06934200 | 1.46185800  | 0.04700300  |
| C | -7.21160500 | -0.43505700 | -0.15620900 |
| H | -6.53443100 | 1.48857700  | -0.77913500 |
| H | -6.64738000 | 1.28671900  | 0.98466700  |
| C | -2.65835300 | 0.92010100  | 0.01198700  |
| H | -4.22349100 | 2.08603800  | -0.84569000 |
| H | -4.17087600 | 2.10777100  | 0.92970400  |
| O | -6.55577500 | -1.57511400 | -0.42452100 |
| O | -8.42676500 | -0.39997600 | -0.10249800 |
| O | -2.42978400 | -0.32358300 | -0.12067900 |
| O | -1.68922900 | 1.74252100  | 0.12170400  |
| U | 0.01514200  | -0.03081500 | 0.05225000  |
| O | 0.11180700  | 0.12420900  | -1.71400000 |
| O | -0.08219300 | -0.18629500 | 1.81830900  |
| H | -5.59257400 | -1.38226000 | -0.41477300 |
| C | 4.11283400  | -1.48458700 | 0.01459100  |
| C | 6.36675400  | -0.71528400 | -0.05510300 |
| C | 2.69609200  | -0.96179600 | 0.09396500  |
| H | 4.22889500  | -2.31196000 | 0.72699800  |
| H | 4.26338900  | -1.88938500 | -0.99691400 |
| C | 7.11213100  | 0.60069100  | -0.19610000 |
| H | 6.86282700  | -1.32782000 | 0.70752700  |
| H | 6.43567600  | -1.24255300 | -1.01707300 |
| O | 2.45697600  | 0.27861000  | 0.23940100  |
| O | 1.73388500  | -1.79106400 | -0.02467300 |
| O | 6.34603700  | 1.70262100  | -0.21109800 |
| O | 8.32173400  | 0.66493100  | -0.31325100 |
| H | 5.41107500  | 1.41780500  | -0.10204400 |
| O | -4.98761900 | 0.38591600  | 0.08708200  |
| O | 5.01965400  | -0.43250500 | 0.28536800  |

## S-tri-22

|   |             |             |             |
|---|-------------|-------------|-------------|
| C | -5.34927500 | 1.45996400  | 0.22479400  |
| C | -5.34892000 | -1.44787100 | 0.25562500  |
| C | -4.21325300 | 2.49406600  | 0.17948500  |
| H | -5.47850100 | 1.13329900  | 1.26243800  |
| H | -6.27938200 | 1.92808200  | -0.10278100 |
| C | -4.21802300 | -2.48765200 | 0.21760100  |
| H | -5.46552300 | -1.10156400 | 1.28844100  |
| H | -6.28450500 | -1.91666400 | -0.05467500 |
| O | -3.04190500 | 2.06963600  | -0.17291500 |
| O | -4.47098100 | 3.66178000  | 0.49626200  |
| O | -3.04431300 | -2.06988100 | -0.13659600 |
| O | -4.48020600 | -3.65240800 | 0.54059500  |
| U | -1.89777200 | -0.00295800 | -0.13627400 |
| O | -2.09447800 | 0.02582600  | 1.65166500  |
| O | -1.73665300 | -0.03328600 | -1.92651700 |
| C | 5.22994800  | 1.44467600  | -0.59760500 |
| C | 5.21984100  | -1.47067800 | -0.57704100 |
| C | 4.15637700  | 2.50636900  | -0.31343500 |
| H | 5.12890200  | 1.11883100  | -1.63862800 |
| H | 6.22267100  | 1.87893100  | -0.46750900 |
| C | 4.13760500  | -2.52012600 | -0.28056500 |
| H | 5.12357300  | -1.15826500 | -1.62260100 |
| H | 6.20882600  | -1.91119400 | -0.43939600 |
| O | 3.05600400  | 2.09136700  | 0.23150200  |
| O | 4.38494300  | 3.67902800  | -0.63163000 |
| O | 3.04529600  | -2.09164800 | 0.26904900  |
| O | 4.35349700  | -3.69652700 | -0.59471500 |
| U | 1.93058800  | 0.00581900  | 0.23836500  |
| O | 1.80937200  | 0.04380500  | 2.03265100  |
| O | 2.13589400  | -0.02497100 | -1.54769800 |
| H | -0.08078100 | 1.86140300  | 0.89607600  |
| H | 0.11047800  | -1.85985200 | -0.78633700 |
| O | 0.00981700  | 1.40034300  | 0.04238200  |
| O | 0.01722700  | -1.39730400 | 0.06625100  |
| S | 5.00136100  | -0.00437300 | 0.50179200  |
| S | -4.96753500 | -0.00530000 | -0.81072300 |
